# Supplementary material
Source: Springer Nature journal article supplement (https://www.springermedizin.de/resource/supplementary/13054_2011_9905_MOESM1_ESM.pdf/9708460)

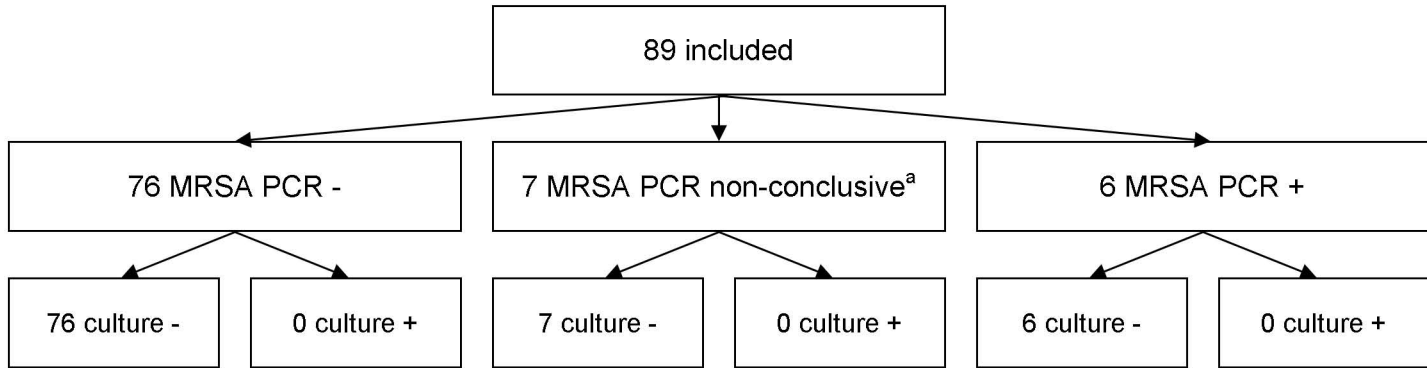

<sup>a</sup>PCR of the nose swab was unresolved (n=6) or missing (n=1)

Supplement: MOESM1 [file 9708460]
